# Supplementary material for: Evolution of the Tim17 protein family
Source: PubMed Central journal article supplement (PMC5072337; doi:10.1186/s13062-016-0157-y), 2016-10-19
Supplement: 13062_2016_157_MOESM3_ESM.pdf [file 13062_2016_157_MOESM3_ESM.pdf]

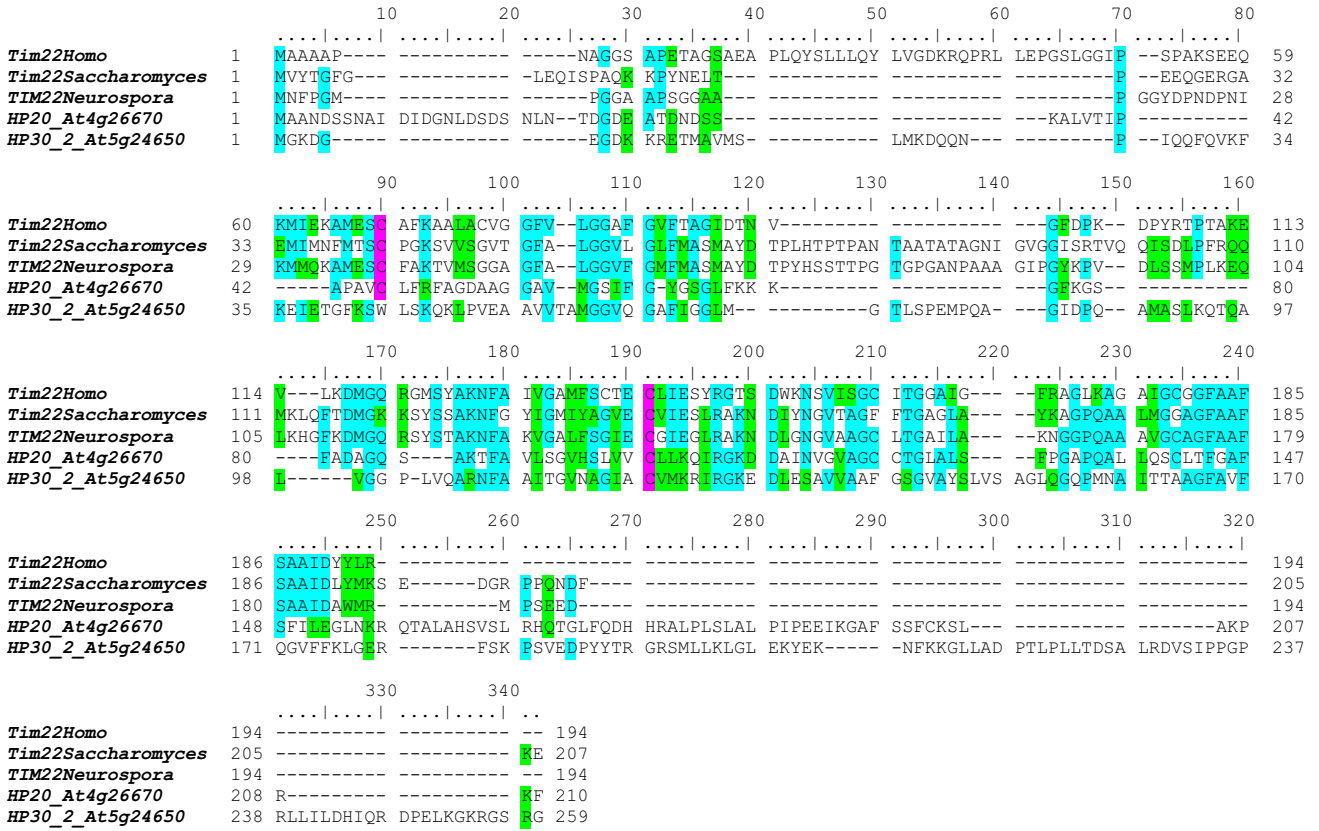

Supplementary Figure 1
