# Supplementary material for: Evolution of the Tim17 protein family
Source: PubMed Central journal article supplement (PMC5072337; doi:10.1186/s13062-016-0157-y), 2016-10-19
Supplement: 13062_2016_157_MOESM5_ESM.pdf [file 13062_2016_157_MOESM5_ESM.pdf]

|                                 |                                                                           |                                                       |    |
|---------------------------------|---------------------------------------------------------------------------|-------------------------------------------------------|----|
| Romo1/Mgr2 <i>S. cerevisiae</i> | MP-----                                                                   | PLPQNYAQQPSNIDKFKM-----                               | 21 |
| Romo1/Mgr2 <i>H. sapiens</i>    | MP-----                                                                   | VAVGPGYQSQPSCFDRVKM-----                              | 21 |
| Romo1/Mgr2 <i>M. domestica</i>  | MP-----                                                                   | VAVGPGYQSQPSCFDRVKM-----                              | 21 |
| Romo1/Mgr2 <i>T. adherens</i>   | M-----                                                                    | PQHYGQPSCFDKVKF-----                                  | 16 |
| Romo1/Mgr2 <i>A. macrogynus</i> | MS-----                                                                   | MMPPPQQQGPSFTDKVKM-----                               | 20 |
| Tim17 <i>S. cerevisiae</i>      | MS-----                                                                   | ADHSRDPCFI-----                                       | 12 |
| Tim17 <i>H. sapiens</i>         | M-----                                                                    | EEYAREPCFW-----                                       | 11 |
| Tim17 <i>M. domestica</i>       | M-----                                                                    | EEYAREPCFW-----                                       | 11 |
| Tim17 <i>T. adherens</i>        | M-----                                                                    | EEYAREPCFY-----                                       | 11 |
| Tim17 <i>A. macrogynus</i>      | MP-----                                                                   | HHDRMRDPCFW-----                                      | 13 |
| Tim23 <i>M. domestica</i>       | ME---GNGGNSNRSSGGLAG---                                                   | FFGGSGGPGSYSNADLAGVPLTGM SPL---                       | 69 |
| Tim23 <i>H. sapiens</i>         | ME---GGGGSGNKTTGGLAG---                                                   | FFGAGGAG--YSHADLAGVPLTGMNPL---                        | 67 |
| Tim23 <i>T. adherens</i>        | MSDDYG---                                                                 | KDGYSRDYSSDPTMSASLSSSTNKALLSPYMNIDPRSLHQDGSSEFIFAGEPV | 58 |
| Tim23 <i>S. cerevisiae</i>      | MSWLFQDKTPTDDANAAVGGQDTTKPKELSLKQSLGFE-----                               | PNINNIISGPGGMHVDTARLHP--LAGLQDKG---                   | 88 |
| Tim23 <i>A. macrogynus</i>      | MS--FFRSFTSSSSSSPDGAPADTSAPVAPAPAPALSQQQQPQQPQQPQPPAIETVGSMLSGLDFTQASRALS | VFVQGLGSG---VEYIFTDDSPHHAASG-----                     | 98 |

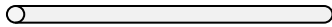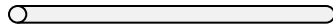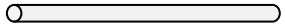

|                                 |                                                                    |                                 |                                    |                                   |                       |              |              |              |          |              |     |
|---------------------------------|--------------------------------------------------------------------|---------------------------------|------------------------------------|-----------------------------------|-----------------------|--------------|--------------|--------------|----------|--------------|-----|
| Romo1/Mgr2 <i>S. cerevisiae</i> | -----GLMMGTTVGVTGILFGGFAIATCG-----                                 | PGPDGVVRLGKYIAGSACTFG---        | LFMISGSIIRSDSESSPMSHPNLNLQQQ--ARLE | EMWKLRAKY                         | 108                   |              |              |              |          |              |     |
| Romo1/Mgr2 <i>H. sapiens</i>    | -----GFVMGCAVGMAGALFPTFSCLRIG-----                                 | MRGRELMGGIGKTMMSGGTIFG---       | TFMAIGMGI                          |                                   | 79                    |              |              |              |          |              |     |
| Romo1/Mgr2 <i>M. domestica</i>  | -----GFVMGCAVGMAGALFPTFSCLRIG-----                                 | MRGRELMGGIGKTMMSGGTIFG---       | TFMAIGMGI                          |                                   | 79                    |              |              |              |          |              |     |
| Romo1/Mgr2 <i>T. adherens</i>   | -----GVMIGFAVGMSSGALFPTYSAFRMG-----                                | LRGRELLSTVKGIMLQGGGTFG---       | VFMIGSAIR                          |                                   | 74                    |              |              |              |          |              |     |
| Romo1/Mgr2 <i>A. macrogynus</i> | -----GAMMGCYGVVGLGFVIGNIQYLLTYG-----                               | ARGKGYLGTLANAITTSASFG---        | FFMAVGSVIRTEGAREIAFPPHARVT         | ARPAALVSAELRESH                   | 108                   |              |              |              |          |              |     |
| Tim17 <i>S. cerevisiae</i>      | -----VILNDFGGAIFAMGALGGVWHGIKGFRNSPLG---                           | ERSGSAMSAIKARAPVLGGNFGVWGLLFS   | TFDCAVKA                           | VKRKREDP---                       | WNSALIA--GFFTGGALAVRG | 106          |              |              |          |              |     |
| Tim17 <i>H. sapiens</i>         | -----RIVDDCGGAFMTGTGGGFQAIKGFNRNSPVG---                            | VNHRLRGSLTAIKTRAPQLGGSAFVWGLLFS | SMIDCSMVQVRKEDP---                 | WNSITS--                          | GALTGAILAARN          | 107          |              |              |          |              |     |
| Tim17 <i>M. domestica</i>       | -----RIVDDCGGAFMTGTGGGFQAIKGFNRNSPVG---                            | IRHRFRGSI                       | SAVRI                              | RAPQIGGSFAVWGLLFS                 | STIDCGLVRLR           | KGKEDP---    | WNSITS--     | GALTGAVLAARS | 107      |              |     |
| Tim17 <i>T. adherens</i>        | -----RIIDDCGGAFSMGCI                                               | GGGFVSLVKG                      | GYRNSPPG---                        | KRLVGSITAIKTRAPVLGGNFAVWGLLFS     | TFDCCLIKLR            | NKEDP---     | WNSIGS--     | GALTGAVLAARG | 105      |              |     |
| Tim17 <i>A. macrogynus</i>      | -----NVLNDAGGAFAMGALGGGWHFVKGARNAPRG---                            | ERFPGAISAMKARAPVLGGNFAVWGLLFS   | TFDCAFAGIR                         | QKEDA---                          | WNSIMS--              | GTLTGGVLAALS | 107          |              |          |              |     |
| Tim23 <i>M. domestica</i>       | KTRGRFELAFFTIGGCCITGAAFGANGLRRLGLKETQKMSWSKPRNVQILNMVTROGALWANTLGS | LALLYSAFGV                      | IEKTRGAEDD---                      | INTVAA--                          | GTMTGM                | LYKCTG       | 174          |              |          |              |     |
| Tim23 <i>H. sapiens</i>         | KTRGRFELAFFTIGGCCITGAAFGANGLRRLGLKETQKMSWSKPRNVQILNMVTROGALWANTLGS | LALLYSAFGV                      | IEKTRGAEDD---                      | INTVAA--                          | GTMTGM                | LYKCTG       | 172          |              |          |              |     |
| Tim23 <i>T. adherens</i>        | KRRSWGGERMFSNVGSSMIGITCGGAWGLFEGLR-TPHGNTMKLRINGILNSCTRRGFFVGN     | SLG---                          | CITILK                             | VTKEDEDNP---                      | YNTVGA--              | AVLTGALFKSTG | 158          |              |          |              |     |
| Tim23 <i>S. cerevisiae</i>      | PSRGWTDL                                                           | CYGTGAVILLGLGIGGFSGMQGLQNI      | PPNSPKGLQLNTV                      | LHITKRG                           | PFLGN                 | NAGILALS     | YNIINSTIDALR | GKHDT---     | AGSIGA-- | GALTGALFKSSK | 193 |
| Tim23 <i>A. macrogynus</i>      | PSRSWTDL                                                           | CYGTGTALLSGLLFGGSWG             | FVQGMRIPLPVASAKLRVNAVLNAMTRR       | GFFVANSIGVLALMYNSMNSAITSQVGTANA-- | PAASVMA--             | AASAGALFKATS | 204          |              |          |              |     |

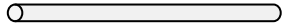

|                                 |                 |                                    |                        |            |                                               |     |
|---------------------------------|-----------------|------------------------------------|------------------------|------------|-----------------------------------------------|-----|
| Romo1/Mgr2 <i>S. cerevisiae</i> | GIH-----        | KD-----                            | 113                    |            |                                               |     |
| Romo1/Mgr2 <i>H. sapiens</i>    | -----           |                                    | 79                     |            |                                               |     |
| Romo1/Mgr2 <i>M. domestica</i>  | -----           |                                    | 79                     |            |                                               |     |
| Romo1/Mgr2 <i>T. adherens</i>   | -----           |                                    | 74                     |            |                                               |     |
| Romo1/Mgr2 <i>A. macrogynus</i> | ARMAAMRSSS-     |                                    | 118                    |            |                                               |     |
| Tim17 <i>S. cerevisiae</i>      | GWHRTRNSSITCACL | LVIEGVGLMFQRYAAWQAKPMAPP--         | PEAPSSQPLQA-----       | 158        |                                               |     |
| Tim17 <i>H. sapiens</i>         | GPVAMVGSAA      | MGGILLALIEGAGILLTRFASAQFPNGPQFAEDP | SQPLPSTQLPSSPFG-----   | DYRQYQ     | 171                                           |     |
| Tim17 <i>M. domestica</i>       | GPLAMVGSAM      | MGGILLALIEGVGILLRYTAQQFRNTPPFTE    | EDPGQLPPKEGSAPPPG----- | YP--GYGQYQ | 173                                           |     |
| Tim17 <i>T. adherens</i>        | GLSSSLRSA       | AVGGILLALIEGVGIAITRMTAEQFKPGWTTVS  | -----                  |            | 147                                           |     |
| Tim17 <i>A. macrogynus</i>      | GWKAALISAT      | VGVLLEMIEGAGVVMNRMNADAFRPQAPL--    | PPELQQQAGMQPSA-----    |            | 162                                           |     |
| Tim23 <i>M. domestica</i>       | GLRGVARGGLTGLT  | LTLSL-----                         | YALYNN--               | WEHMKGS    | LTQQSL---                                     | 211 |
| Tim23 <i>H. sapiens</i>         | GLRGIARGGLTGLT  | LTLSL-----                         | YALYNN--               | WEHMKGS    | LTQQSL---                                     | 209 |
| Tim23 <i>T. adherens</i>        | GIRATALAA       | AIGGTLAVT-----                     | YHFQMI                 | WQEKPT     | FTSPNWSS--                                    | 198 |
| Tim23 <i>S. cerevisiae</i>      | GLKPMGYSSAM     | VAAACAV-----                       | WCSVKKR                | LLEK-----  |                                               | 222 |
| Tim23 <i>A. macrogynus</i>      | TLRLDSPSLL      | FLRSETDP-----                      | TPFSTR--               | WRPANGHLE  | ERHVRVGRSPLASDQANPRGLAICRQDCHALVRLDAPGRGLLVFE | 281 |

Supplementary Figure 2
