# Supplementary material for: Evolution of the Tim17 protein family
Source: PubMed Central journal article supplement (PMC5072337; doi:10.1186/s13062-016-0157-y), 2016-10-19
Supplement: 13062_2016_157_MOESM6_ESM.pdf [file 13062_2016_157_MOESM6_ESM.pdf]

Supplementary table 3. PRAT motif in prokaryotic proteins

| No. | Entry Name                           | Position | Description                                                                                 |
|-----|--------------------------------------|----------|---------------------------------------------------------------------------------------------|
| 1   | <a href="#">ebi:EbC_44000</a>        | 242..272 | bscC; cellulose synthase operon protein C                                                   |
| 2   | <a href="#">xcc:XCC2930</a>          | 626..656 | yoaA; ATP-dependent helicase                                                                |
| 3   | <a href="#">xcb:XC_1178</a>          | 626..656 | ATP-dependent helicase                                                                      |
| 4   | <a href="#">xca:xcc-b100_1222</a>    | 626..656 | putative ATP-dependent DNA helicase                                                         |
| 5   | <a href="#">xtn:FD63_04990</a>       | 623..653 | helicase                                                                                    |
| 6   | <a href="#">sml:Smlt0528</a>         | 709..739 | putative NHL repeat protein                                                                 |
| 7   | <a href="#">smt:Smal_0408</a>        | 135..165 | SMP-30/Gluconolactonase/LRE domain protein                                                  |
| 8   | <a href="#">buj:BurJV3_0430</a>      | 135..165 | NHL repeat containing protein                                                               |
| 9   | <a href="#">buj:BurJV3_0875</a>      | 182..212 | OmpA/MotB domain protein                                                                    |
| 10  | <a href="#">smz:SMD_0447</a>         | 94..124  | NHL repeat protein                                                                          |
| 11  | <a href="#">smz:SMD_0961</a>         | 182..212 | OmpA domain protein                                                                         |
| 12  | <a href="#">psd:DSC_05750</a>        | 162..192 | thiamine biosynthesis protein                                                               |
| 13  | <a href="#">psd:DSC_13310</a>        | 295..325 | hemE; uroporphyrinogen decarboxylase                                                        |
| 14  | <a href="#">psk:U771_21305</a>       | 212..242 | ABC transporter ATP-binding protein                                                         |
| 15  | <a href="#">slo:Shew_2313</a>        | 121..151 | Fe-S protein assembly chaperone HscA                                                        |
| 16  | <a href="#">pseo:OM33_08005</a>      | 368..398 | cytochrome C biogenesis protein                                                             |
| 17  | <a href="#">maq:Maqu_3023</a>        | 88..118  | chaperone DnaJ domain protein                                                               |
| 18  | <a href="#">mhc:MARHY2962</a>        | 88..118  | cbpA; curved DNA-binding protein, analogue of the DnaJ, co-chaperone of DnaK (Hsp40 family) |
| 19  | <a href="#">mad:HP15_2909</a>        | 93..123  | heat shock protein DnaJ domain protein                                                      |
| 20  | <a href="#">msr:AU15_20210</a>       | 28..58   | hypothetical protein                                                                        |
| 21  | <a href="#">mari:ACP86_04740</a>     | 88..118  | cytochrome C biogenesis protein                                                             |
| 22  | <a href="#">tvi:Thivi_3349</a>       | 612..642 | DNA helicase, Rad3                                                                          |
| 23  | <a href="#">mpur:MARPU_07805</a>     | 106..136 | methyl-accepting chemotaxis protein                                                         |
| 24  | <a href="#">aeh:MIg_1232</a>         | 671..701 | putative membrane protein; K07288 uncharacterized membrane protein                          |
| 25  | <a href="#">mpc:Mar181_2354</a>      | 346..376 | porin gram-negative type                                                                    |
| 26  | <a href="#">but:X994_6345</a>        | 501..531 | phage integrase family protein                                                              |
| 27  | <a href="#">bph:Bphy_2047</a>        | 247..277 | protein of unknown function DUF477                                                          |
| 28  | <a href="#">bpy:Bphyt_4736</a>       | 176..206 | hypothetical protein                                                                        |
| 29  | <a href="#">bue:BRPE67_ACDS01190</a> | 56..86   | uncharacterized protein                                                                     |
| 30  | <a href="#">bue:BRPE67_CCDS11140</a> | 249..279 | uncharacterized protein precursor                                                           |
| 31  | <a href="#">axy:AXYL_03112</a>       | 137..167 | Tat pathway signal sequence domain protein 15                                               |
| 32  | <a href="#">axo:NH44784_041941</a>   | 241..271 | TonB-dependent receptor; Outer membrane receptor for ferrienterochelin and colicins         |
| 33  | <a href="#">axo:NH44784_053511</a>   | 29..59   | hypothetical protein                                                                        |
| 34  | <a href="#">axn:AX27061_2371</a>     | 241..271 | TonB-dependent receptor                                                                     |
| 35  | <a href="#">axn:AX27061_3580</a>     | 29..59   | hypothetical protein                                                                        |
| 36  | <a href="#">axs:LH59_16440</a>       | 29..59   | hypothetical protein                                                                        |
| 37  | <a href="#">dac:Daci_4352</a>        | 494..524 | multi-sensor hybrid histidine kinase (EC:2.7.13.3)                                          |
| 38  | <a href="#">vap:Vapar_4522</a>       | 513..543 | Polypeptide-transport-associated domain protein ShlB-type                                   |
| 39  | <a href="#">vap:Vapar_6356</a>       | 494..524 | Polypeptide-transport-associated domain protein ShlB-type                                   |
| 40  | <a href="#">vpe:Varpa_2158</a>       | 512..542 | polypeptide-transport-associated domain-containing protein shlB-type                        |

Supplementary table 3. PRAT motif in prokaryotic proteins

|    |                                       |            |                                                                      |
|----|---------------------------------------|------------|----------------------------------------------------------------------|
| 41 | <a href="#">vpe:Varpa_3931</a>        | 502..532   | polypeptide-transport-associated domain-containing protein shlb-type |
| 42 | <a href="#">vpd:VAPA_2c07470</a>      | 520..550   | shlB1; putative hemolysin transporter protein ShlB                   |
| 43 | <a href="#">vpd:VAPA_2c09540</a>      | 509..539   | shlB2; putative hemolysin transporter protein ShlB                   |
| 44 | <a href="#">mpt:Mpe_A1216</a>         | 148..178   | thiamine biosynthesis lipoprotein                                    |
| 45 | <a href="#">mms:mma_3616</a>          | 176..206   | apbE; thiamine biosynthesis lipoprotein                              |
| 46 | <a href="#">rge:RGE_07540</a>         | 179..209   | hypothetical protein                                                 |
| 47 | <a href="#">nis:NIS_1752</a>          | 66..96     | hypothetical protein                                                 |
| 48 | <a href="#">gur:Gura_2011</a>         | 143..173   | beta-hydroxyacyl-(acyl-carrier-protein) dehydratase, FabA/FabZ       |
| 49 | <a href="#">gbm:Gbem_1975</a>         | 184..214   | modC-1; molybdate ABC transporter, ATP-binding protein               |
| 50 | <a href="#">gbm:Gbem_2437</a>         | 302..332   | cell division protein, SpoIID family, putative                       |
| 51 | <a href="#">geo:Geob_3148</a>         | 143..173   | polyketide synthase                                                  |
| 52 | <a href="#">geb:GM18_2234</a>         | 184..214   | molybdate ABC transporter, ATPase subunit                            |
| 53 | <a href="#">ppd:Ppro_2603</a>         | 26..56     | uncharacterized domain 1                                             |
| 54 | <a href="#">dpi:BN4_11679</a>         | 80..110    | hypothetical protein                                                 |
| 55 | <a href="#">dgg:DGI_1393</a>          | 450..480   | putative multi-sensor hybrid histidine kinase                        |
| 56 | <a href="#">ade:Adeh_0117</a>         | 34..64     | SSU ribosomal protein S18P                                           |
| 57 | <a href="#">acp:A2cp1_0135</a>        | 32..62     | ribosomal protein S18                                                |
| 58 | <a href="#">ank:Anaek_0124</a>        | 34..64     | rpsR; 30S ribosomal protein S18                                      |
| 59 | <a href="#">ank:Anaek_1325</a>        | 1212..1242 | hypothetical protein                                                 |
| 60 | <a href="#">mym:A176_005302</a>       | 164..194   | Outer membrane vitamin B12 receptor BtuB                             |
| 61 | <a href="#">vin:AKJ08_2310</a>        | 73..103    | 4-diphosphocytidyl-2-C-methyl-D-erythritol kinase                    |
| 62 | <a href="#">scl:sce9355</a>           | 1768..1798 | cellulose synthase 1 operon protein C                                |
| 63 | <a href="#">scu:SCE1572_23355</a>     | 125..155   | hypothetical protein                                                 |
| 64 | <a href="#">scu:SCE1572_43460</a>     | 288..318   | hypothetical protein                                                 |
| 65 | <a href="#">hoh:Hoch_6735</a>         | 79..109    | hypothetical protein                                                 |
| 66 | <a href="#">hoe:IMCC20628_03022</a>   | 479..509   | pseudouridine synthase family protein (EC:5.4.99.22)                 |
| 67 | <a href="#">rec:RHECIAT_CH0000375</a> | 441..471   | putative carboxypeptidase-related protein (EC:3.4.16.-)              |
| 68 | <a href="#">rle:RL0352</a>            | 441..471   | putative exported peptidase                                          |
| 69 | <a href="#">rtl:Rleg2_4351</a>        | 442..472   | peptidase S10 serine carboxypeptidase                                |
| 70 | <a href="#">rlg:Rleg_4619</a>         | 443..473   | peptidase S10 serine carboxypeptidase                                |
| 71 | <a href="#">rhl:LPU83_pLPU83d0946</a> | 165..195   | putative secreted protein                                            |
| 72 | <a href="#">mor:MOC_1747</a>          | 70..100    | Catalase (EC:1.11.1.6)                                               |
| 73 | <a href="#">rva:Rvan_1086</a>         | 12..42     | hypothetical protein                                                 |
| 74 | <a href="#">rva:Rvan_2815</a>         | 12..42     | hypothetical protein                                                 |
| 75 | <a href="#">rli:RLO149_c031200</a>    | 2437..2467 | hypothetical protein                                                 |
| 76 | <a href="#">malg:MALG_01407</a>       | 171..201   | Precorrin-6x reductase (EC:1.3.1.54)                                 |
| 77 | <a href="#">mmr:Mmar10_0227</a>       | 108..138   | PfkB domain protein                                                  |
| 78 | <a href="#">sphm:G432_09150</a>       | 141..171   | hopanoid biosynthesis associated RND transporter-like protein HpnN   |
| 79 | <a href="#">ssan:NX02_17690</a>       | 325..355   | hypothetical protein                                                 |
| 80 | <a href="#">rpm:RSPPHO_03231</a>      | 3..33      | Chemotaxis sensory transducer                                        |
| 81 | <a href="#">baco:OXB_0786</a>         | 582..612   | hypothetical protein                                                 |
| 82 | <a href="#">paeh:H70357_32940</a>     | 257..287   | translation factor                                                   |
| 83 | <a href="#">lpl:lp_3363</a>           | 378..408   | copB; copper transporting ATPase                                     |
| 84 | <a href="#">lpi:JDM1_2696</a>         | 378..408   | copB; copper transporting ATPase                                     |
| 85 | <a href="#">lpt:zj316_0024</a>        | 378..408   | copB; Copper transporting ATPase (EC:3.6.3.4)                        |
| 86 | <a href="#">lps:LPST_C2765</a>        | 378..408   | copB; copper transporting ATPase                                     |
| 87 | <a href="#">lpr:LBP_cg2691</a>        | 378..408   | copB; Copper transporting ATPase                                     |
| 88 | <a href="#">lpz:Lp16_2647</a>         | 378..408   | copper transporting ATPase                                           |
| 89 | <a href="#">ljb:SH83_13980</a>        | 378..408   | ATPase                                                               |
| 90 | <a href="#">sth:STH3159</a>           | 134..164   | conserved domain protein                                             |

Supplementary table 3. PRAT motif in prokaryotic proteins

|     |                                   |          |                                                                               |
|-----|-----------------------------------|----------|-------------------------------------------------------------------------------|
| 91  | <a href="#">mas:Mahau_2082</a>    | 71..101  | 4-diphosphocytidyl-2-C-methyl-D-erythritol kinase                             |
| 92  | <a href="#">mtu:Rv3313c</a>       | 221..251 | add; adenosine deaminase                                                      |
| 93  | <a href="#">mtv:RVBD_3313c</a>    | 221..251 | adenosine deaminase Add                                                       |
| 94  | <a href="#">mra:MRA_3355</a>      | 221..251 | add; adenosine deaminase (EC:3.5.4.4)                                         |
| 95  | <a href="#">mf:TBF3G_13344</a>    | 221..251 | adenosine deaminase add (adenosine aminohydrolase)                            |
| 96  | <a href="#">mtb:TBMG_03362</a>    | 221..251 | adenosine deaminase                                                           |
| 97  | <a href="#">mtk:TBSG_03385</a>    | 221..251 | adenosine deaminase add                                                       |
| 98  | <a href="#">mtz:TBXG_003342</a>   | 221..251 | adenosine deaminase add                                                       |
| 99  | <a href="#">mtg:MRGA327_20415</a> | 221..251 | adenosine deaminase (EC:3.5.4.4)                                              |
| 100 | <a href="#">mti:MRGA423_20825</a> | 221..251 | adenosine deaminase (EC:3.5.4.4)                                              |
| 101 | <a href="#">mte:CCDC5079_3062</a> | 221..251 | adenosine deaminase add                                                       |
| 102 | <a href="#">mtur:CFBS_3506</a>    | 221..251 | add; adenosine deaminase                                                      |
| 103 | <a href="#">mtl:CCDC5180_3023</a> | 221..251 | adenosine deaminase add                                                       |
| 104 | <a href="#">mto:MTCTRI2_3381</a>  | 221..251 | add; adenosine deaminase                                                      |
| 105 | <a href="#">mtd:UDA_3313c</a>     | 221..251 | add; hypothetical protein                                                     |
| 106 | <a href="#">mtn:ERDMAN_3631</a>   | 221..251 | add; adenosine deaminase                                                      |
| 107 | <a href="#">mtj:J112_17805</a>    | 221..251 | adenosine deaminase (EC:3.5.4.4)                                              |
| 108 | <a href="#">mtub:MT7199_3356</a>  | 221..251 | putative ADENOSINE DEAMINASE ADD (ADENOSINE AMINOHYDROLASE) (EC:3.5.4.4)      |
| 109 | <a href="#">mtuc:J113_23150</a>   | 219..249 | adenosine deaminase (EC:3.5.4.4)                                              |
| 110 | <a href="#">mtue:J114_17770</a>   | 221..251 | adenosine deaminase (EC:3.5.4.4)                                              |
| 111 | <a href="#">mtx:M943_17125</a>    | 221..251 | adenosine deaminase                                                           |
| 112 | <a href="#">mtul:TBHG_03250</a>   | 221..251 | adenosine deaminase Add                                                       |
| 113 | <a href="#">mtut:HKBT1_3493</a>   | 221..251 | add; adenosine deaminase                                                      |
| 114 | <a href="#">mtuu:HKBT2_3500</a>   | 221..251 | add; adenosine deaminase                                                      |
| 115 | <a href="#">mtg:HKBS1_3503</a>    | 221..251 | add; adenosine deaminase                                                      |
| 116 | <a href="#">mbo:Mb3342c</a>       | 221..251 | add; adenosine deaminase (EC:3.5.4.4)                                         |
| 117 | <a href="#">mbb:BCG_3379c</a>     | 221..251 | add; adenosine deaminase (EC:3.5.4.4)                                         |
| 118 | <a href="#">mbt:JTY_3339</a>      | 221..251 | add_1; adenosine deaminase (EC:3.5.4.4)                                       |
| 119 | <a href="#">mbt:JTY_3359</a>      | 221..251 | add_2; adenosine deaminase (EC:3.5.4.4)                                       |
| 120 | <a href="#">mbt:JTY_3379</a>      | 221..251 | add_3; adenosine deaminase (EC:3.5.4.4)                                       |
| 121 | <a href="#">mbm:BCGMEX_3377c</a>  | 221..251 | add; Adenosine deaminase (EC:3.5.4.4)                                         |
| 122 | <a href="#">mbk:K60_034450</a>    | 221..251 | adenosine deaminase add                                                       |
| 123 | <a href="#">mbx:BCGT_3177</a>     | 221..251 | Adenosine deaminase (EC:3.5.4.4)                                              |
| 124 | <a href="#">mbz:LH58_18015</a>    | 221..251 | adenosine deaminase                                                           |
| 125 | <a href="#">maf:MAF_33250</a>     | 221..251 | add; adenosine deaminase (EC:3.5.4.4)                                         |
| 126 | <a href="#">mce:MCAN_33391</a>    | 221..251 | add; putative adenosine deaminase ADD (adenosine aminohydrolase)              |
| 127 | <a href="#">mcg:BN44_70108</a>    | 221..251 | add; Putative adenosine deaminase Add (adenosine aminohydrolase) (EC:3.5.4.4) |
| 128 | <a href="#">mcv:BN43_60332</a>    | 221..251 | add; Putative adenosine deaminase Add (adenosine aminohydrolase) (EC:3.5.4.4) |
| 129 | <a href="#">mcx:BN42_41374</a>    | 221..251 | add; Putative adenosine deaminase Add (adenosine aminohydrolase) (EC:3.5.4.4) |
| 130 | <a href="#">mcz:BN45_60354</a>    | 221..251 | add; Putative adenosine deaminase Add (adenosine aminohydrolase) (EC:3.5.4.4) |
| 131 | <a href="#">mle:ML0700</a>        | 221..251 | add; adenosine deaminase (EC:3.5.4.4)                                         |
| 132 | <a href="#">mlb:MLBr_00700</a>    | 221..251 | add; adenosine deaminase                                                      |
| 133 | <a href="#">mul:MUL_4210</a>      | 123..153 | galE1; UDP-glucose 4-epimerase GalE1                                          |
| 134 | <a href="#">mgi:Mflv_3124</a>     | 73..103  | conserved hypothetical protein                                                |
| 135 | <a href="#">mgi:Mflv_4841</a>     | 221..251 | adenosine deaminase (EC:3.5.4.4)                                              |
| 136 | <a href="#">msp:Mspyr1_24410</a>  | 73..103  | hypothetical protein                                                          |
| 137 | <a href="#">msp:Mspyr1_42510</a>  | 221..251 | adenosine deaminase (EC:3.5.4.4)                                              |
| 138 | <a href="#">mab:MAB_3890c</a>     | 198..228 | Probable histidine kinase response regulator                                  |
| 139 | <a href="#">mabb:MASS_3902</a>    | 198..228 | two-component histidine kinase DevS                                           |
| 140 | <a href="#">mmv:MYCMA_2153</a>    | 198..228 | histidine kinase                                                              |

Supplementary table 3. PRAT motif in prokaryotic proteins

|     |                                     |          |                                                                                    |
|-----|-------------------------------------|----------|------------------------------------------------------------------------------------|
| 141 | <a href="#">may:LA62_19745</a>      | 198..228 | histidine kinase                                                                   |
| 142 | <a href="#">mabo:NF82_19480</a>     | 198..228 | histidine kinase                                                                   |
| 143 | <a href="#">mabl:MMASJCM_3907</a>   | 198..228 | putative sensor kinase                                                             |
| 144 | <a href="#">maz:LA61_19645</a>      | 198..228 | histidine kinase                                                                   |
| 145 | <a href="#">mak:LH56_04740</a>      | 198..228 | histidine kinase                                                                   |
| 146 | <a href="#">mys:NF92_04800</a>      | 198..228 | histidine kinase                                                                   |
| 147 | <a href="#">myc:NF90_04795</a>      | 198..228 | histidine kinase                                                                   |
| 148 | <a href="#">mmi:MMAR_5133</a>       | 123..153 | galE1; UDP-glucose 4-epimerase GalE1                                               |
| 149 | <a href="#">mli:MULP_05396</a>      | 123..153 | galE1; UDP-glucose 4-epimerase GalE1 (EC:5.1.3.2)                                  |
| 150 | <a href="#">mkn:MKAN_05520</a>      | 63..93   | hypothetical protein                                                               |
| 151 | <a href="#">mkn:MKAN_20790</a>      | 221..251 | adenosine deaminase                                                                |
| 152 | <a href="#">mks:LG40_05460</a>      | 43..73   | hypothetical protein                                                               |
| 153 | <a href="#">mks:LG40_20605</a>      | 221..251 | adenosine deaminase                                                                |
| 154 | <a href="#">mki:LH54_05465</a>      | 43..73   | hypothetical protein                                                               |
| 155 | <a href="#">mki:LH54_20720</a>      | 221..251 | adenosine deaminase                                                                |
| 156 | <a href="#">cik:ik0046</a>          | 131..161 | putative ThiJ/Pfpl family protein                                                  |
| 157 | <a href="#">car:cauri_0738</a>      | 131..161 | ThiJ/Pfpl family protein                                                           |
| 158 | <a href="#">ckp:ckrop_2062</a>      | 114..144 | putative ThiJ/Pfpl family protein                                                  |
| 159 | <a href="#">cii:CIMIT_03240</a>     | 40..70   | oxidoreductase                                                                     |
| 160 | <a href="#">cii:CIMIT_07450</a>     | 131..161 | thiamine biosynthesis protein ThiJ                                                 |
| 161 | <a href="#">coa:DR71_1702</a>       | 133..163 | DJ-1/Pfpl family protein                                                           |
| 162 | <a href="#">csx:CSING_04185</a>     | 131..161 | Putative amidotransferase                                                          |
| 163 | <a href="#">csx:CSING_07665</a>     | 132..162 | tdcG; L-serine dehydratase, iron-sulfur-dependent, single chain form (EC:4.3.1.17) |
| 164 | <a href="#">cmv:CMUST_01965</a>     | 4..34    | putative DUF1266 family protein                                                    |
| 165 | <a href="#">rer:RER_20480</a>       | 220..250 | add; adenosine deaminase (EC:3.5.4.4)                                              |
| 166 | <a href="#">rev:Q5Y_09845</a>       | 220..250 | adenosine deaminase (EC:3.5.4.4)                                                   |
| 167 | <a href="#">reb:XU06_10080</a>      | 220..250 | adenosine deaminase                                                                |
| 168 | <a href="#">gbr:Gbro_4631</a>       | 96..126  | SNARE associated Golgi protein-like protein                                        |
| 169 | <a href="#">srt:Strot_0620</a>      | 69..99   | preprotein translocase subunit SecG                                                |
| 170 | <a href="#">src:M271_08210</a>      | 47..77   | hypothetical protein                                                               |
| 171 | <a href="#">lxx:Lxx18130</a>        | 476..506 | two-component system, sensor protein                                               |
| 172 | <a href="#">mim:AKG07_07185</a>     | 127..157 | 4-diphosphocytidyl-2C-methyl-D-erythritol kinase (EC:2.7.1.148)                    |
| 173 | <a href="#">mio:AOA12_01215</a>     | 502..532 | cytochrome C biogenesis protein                                                    |
| 174 | <a href="#">iva:Isova_1057</a>      | 142..172 | hypothetical protein                                                               |
| 175 | <a href="#">ars:ADJ73_06540</a>     | 23..53   | enoyl reductase                                                                    |
| 176 | <a href="#">ppc:HMPREF9154_2947</a> | 281..311 | hypothetical protein                                                               |
| 177 | <a href="#">fre:Franean1_7288</a>   | 551..581 | serine/threonine protein kinase                                                    |
| 178 | <a href="#">fri:FraEul1c_7136</a>   | 544..574 | serine/threonine protein kinase                                                    |
| 179 | <a href="#">fal:FRAAL3011</a>       | 720..750 | LuxR family transcriptional regulator                                              |
| 180 | <a href="#">bsd:BLASA_3360</a>      | 43..73   | putative Dihydrofolate reductase                                                   |
| 181 | <a href="#">amd:AMED_4809</a>       | 157..187 | MerR family transcriptional regulator                                              |
| 182 | <a href="#">amn:RAM_24480</a>       | 157..187 | MerR family transcriptional regulator                                              |
| 183 | <a href="#">amm:AMES_4750</a>       | 157..187 | MerR family transcriptional regulator                                              |
| 184 | <a href="#">amz:B737_4750</a>       | 157..187 | MerR family transcriptional regulator                                              |
| 185 | <a href="#">kphy:AOZ06_32210</a>    | 515..545 | hypothetical protein                                                               |
| 186 | <a href="#">afs:AFR_01450</a>       | 484..514 | putative DEAD/DEAH box helicase                                                    |
| 187 | <a href="#">acq:AM609_06650</a>     | 132..162 | thiamine biosynthesis protein ThiJ                                                 |
| 188 | <a href="#">rxy:Rxyl_0550</a>       | 88..118  | hypothetical protein                                                               |
| 189 | <a href="#">gpa:GPA_30220</a>       | 268..298 | hypothetical protein                                                               |
| 190 | <a href="#">apv:Apar_0409</a>       | 60..90   | transcriptional regulator, LysR family                                             |

**Supplementary table 3.** PRAT motif in prokaryotic proteins

|     |                                   |           |                                                        |
|-----|-----------------------------------|-----------|--------------------------------------------------------|
| 191 | <a href="#">taz:TREAZ_2244</a>    | 617..647  | peptidase, U32 family                                  |
| 192 | <a href="#">gma:Acix8_3091</a>    | 94..124   | cobalamin 5'-phosphate synthase                        |
| 193 | <a href="#">sus:Acid_1225</a>     | 495..525  | NHL repeat containing protein                          |
| 194 | <a href="#">hao:PCC7418_0289</a>  | 288..318  | photosystem I core protein PsaB                        |
| 195 | <a href="#">gei:GEI7407_1208</a>  | 986..1016 | protein of unknown function DUF490                     |
| 196 | <a href="#">arp:NIES39_N00970</a> | 158..188  | hypothetical protein                                   |
| 197 | <a href="#">pgi:PG1715</a>        | 759..789  | hypothetical protein                                   |
| 198 | <a href="#">pgn:PGN_0400</a>      | 798..828  | hypothetical protein                                   |
| 199 | <a href="#">pgt:PGTDC60_0586</a>  | 788..818  | hypothetical protein                                   |
| 200 | <a href="#">afd:Alfi_1149</a>     | 243..273  | Acyl-protein synthetase, LuxE                          |
| 201 | <a href="#">ash:AL1_22280</a>     | 243..273  | Acyl-protein synthetase, LuxE.                         |
| 202 | <a href="#">doi:FH5T_20350</a>    | 148..178  | HupE / UreJ protein                                    |
| 203 | <a href="#">hhy:Halhy_2969</a>    | 198..228  | peptidase S8 and S53 subtilisin kexin sedolisin        |
| 204 | <a href="#">hmu:Hmuk_1595</a>     | 352..382  | oligopeptide/dipeptide ABC transporter, ATPase subunit |
| 205 | <a href="#">htu:Htur_5093</a>     | 223..253  | hypothetical protein                                   |
| 206 | <a href="#">hah:Halar_3531</a>    | 264..294  | protein of unknown function DUF87                      |
